# Supplementary material
Source: PubMed Central journal article supplement (PMC4622495)
Supplement: kmab-07-01-989020-s001.pdf [file kmab-07-01-989020-s001.pdf]

# Supplementary Figure S1

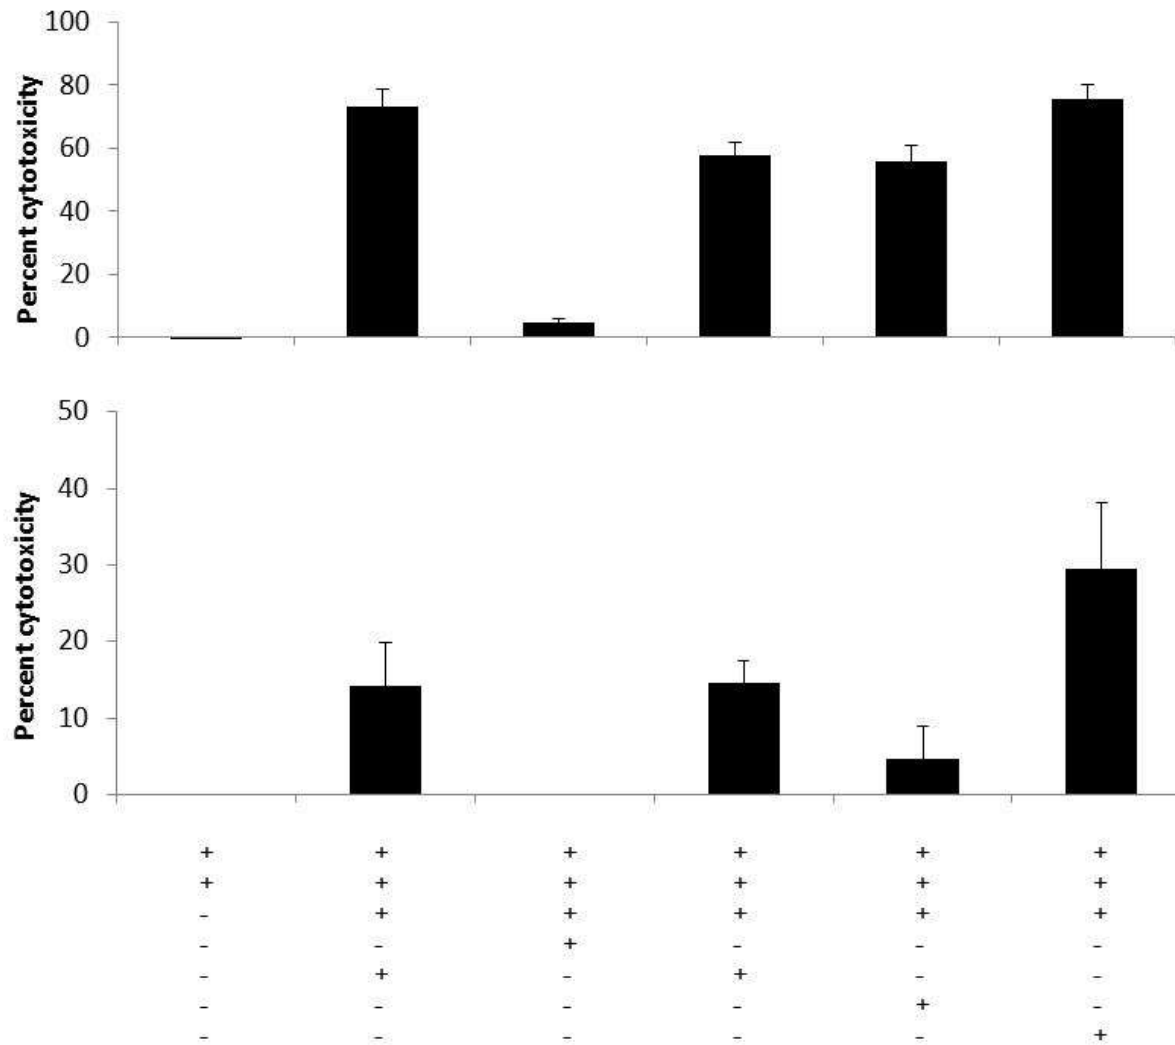

**Supplementary Figure S1. Effect of kinase inhibitors on ADCC induced by trastuzumab with PBMC and purified NK cells as effector cells.**

ADCC was performed with BT474 cells as target cells, 1µg/mL trastuzumab, and peripheral blood mononuclear cells (E:T = 50 :1, top panel) or purified human NK cells (E:T = 5:1, bottom panel) as effector cells. Ibrutinib, idelalisib, NVP-BE2235 and LY294002 were used at 10 µM.

Supplementary Figure S2

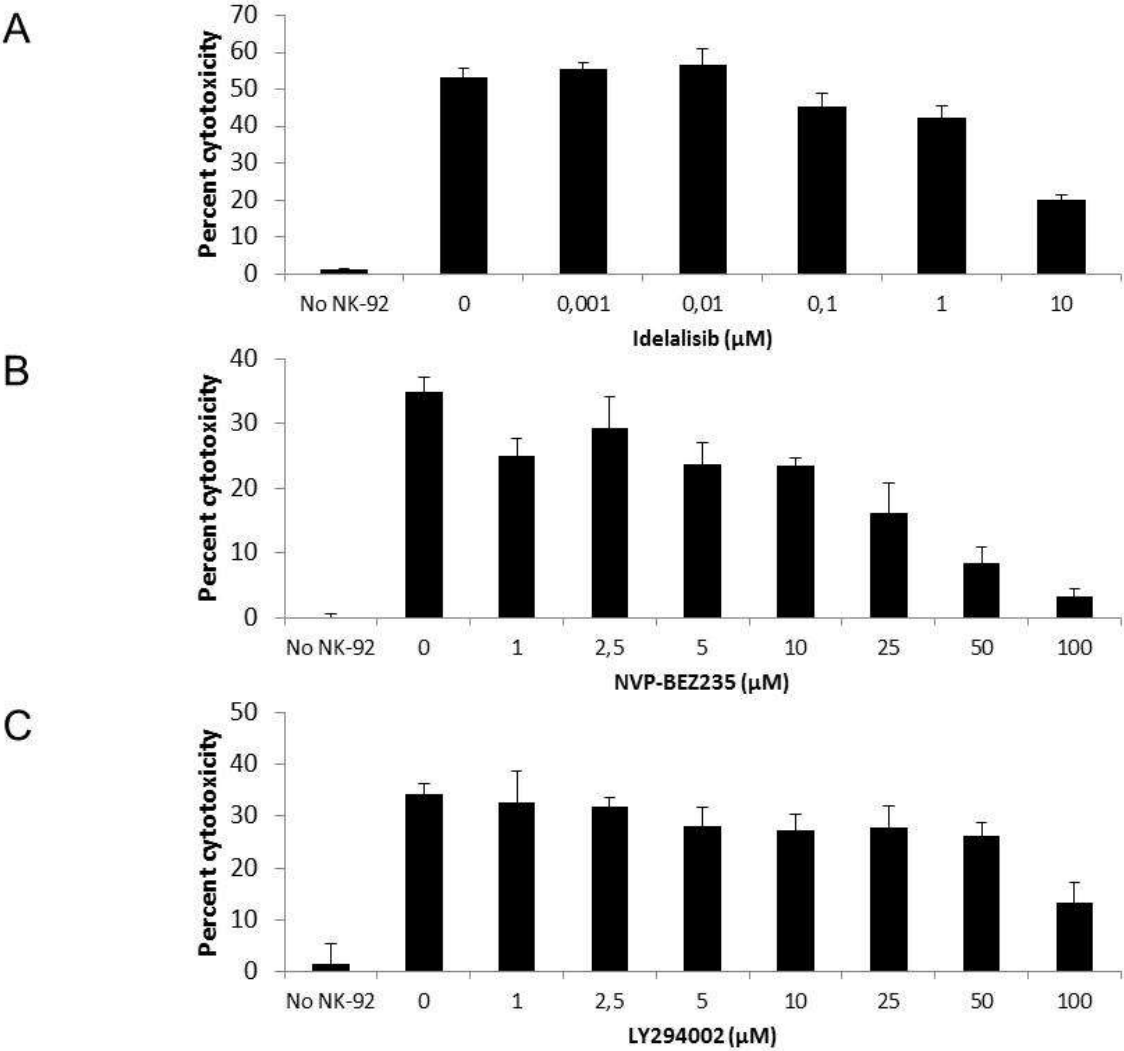

Supplementary Figure S2. Dose-response of idelalisib, NVP-BEZ235 and LY294002 on ADCC induced by trastuzumab.

ADCC assays were performed with BT474 cells as target cells, 1 µg/mL trastuzumab, and NK-92 cells as effector cells (E:T=5:1), in the presence of idelalisib, NVP-BEZ235 or LY294002 at indicated concentrations.

# Supplementary Figure S3

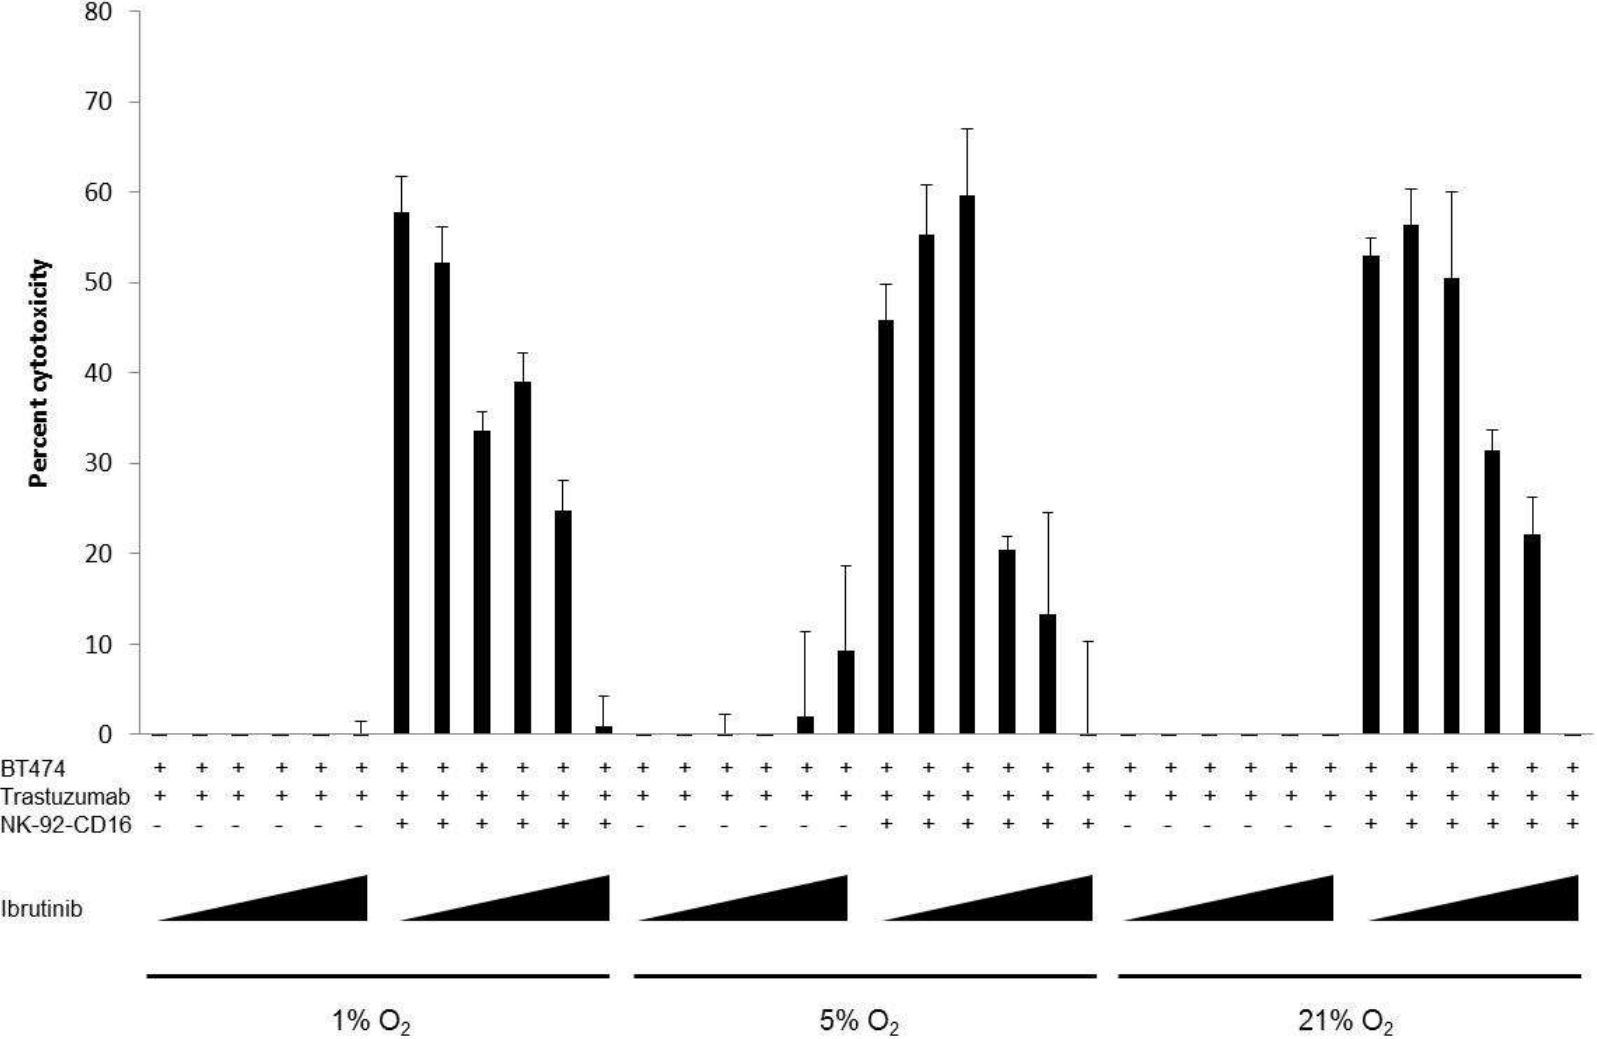

**Supplementary Figure S3. Effect of ibrutinib on ADCC induced by trastuzumab in hypoxic and normoxic conditions.**

ADCC assays were performed with BT474 cells as target cells, 1 μg/mL trastuzumab, and NK-92 cells as effector cells (E:T=5:1), in normoxic (21% O<sub>2</sub>) or hypoxic (5% or 1% O<sub>2</sub>) conditions. Ibrutinib was used at 0, 0.001, 0.01, 0.1, 1 and 10 μM.

## Supplementary Figure S4

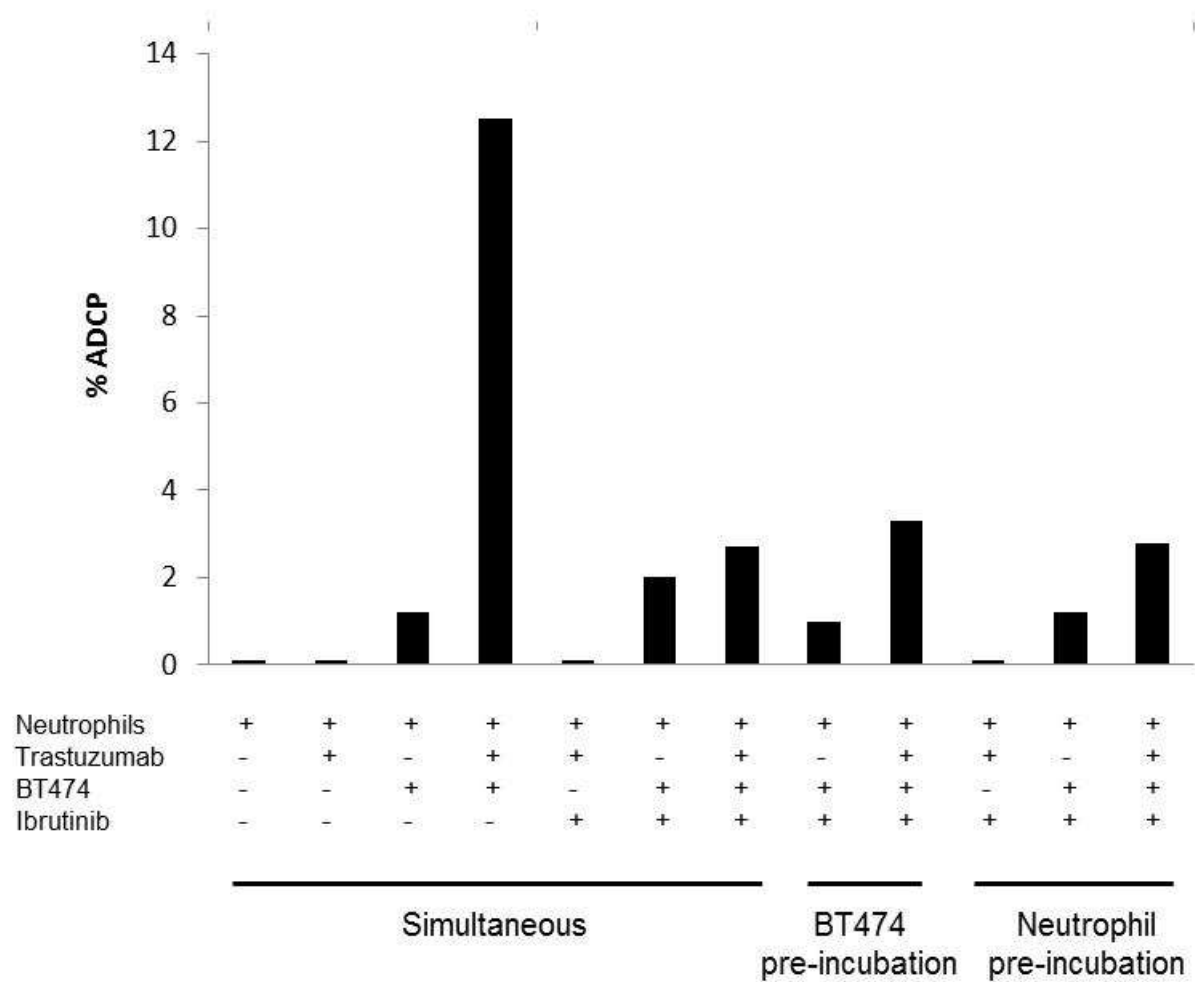

**Supplementary Figure S4. Effect of pre-incubation of effector or target cells with ibrutinib on ADCC induced by trastuzumab.**

Phagocytosis study was performed in the absence or the presence of 10  $\mu$ M ibrutinib, either added simultaneously or pre-incubated with BT474 cells or neutrophils.
